# Supplementary material
Source: MDPI journal article supplement (https://www.mdpi.com/2071-1050/15/17/12702)
Supplement: s1 [file s1]

Supplementary Table S1. Results for NO<sub>2</sub> and NO<sub>x</sub>: mean comparison (Student's t-test for parametric samples; P and Wilcoxon rank-sum test for non-parametric samples (NP) of daily average concentrations (µg/m<sup>3</sup>) from traffic air quality stations (UT and SUT) and mean difference in the six COVID-19 periods identified in the pandemic scenario.

| NO <sub>2</sub> (µg/m <sup>3</sup> ) |                      |         |      |                       |         |      |                 |         |      |                     |         |      |                       |         |      |                          |         |      |                         |         |      |                              |         |      |                       |         |      |
|--------------------------------------|----------------------|---------|------|-----------------------|---------|------|-----------------|---------|------|---------------------|---------|------|-----------------------|---------|------|--------------------------|---------|------|-------------------------|---------|------|------------------------------|---------|------|-----------------------|---------|------|
| UT Air quality station               | UT 1-Plaza de España |         |      | UT 2-Escuelas Aguirre |         |      | UT 3-Castellana |         |      | UT 4-Cuatro Caminos |         |      | UT 5-Plaza Elíptica   |         |      | UT 6-Ramón y Cajal       |         |      | UT 7-Moratalaz          |         |      | UT 8-Plaza de Castilla       |         |      | UT 9-Barrio del Pilar |         |      |
| COVID-19 periods                     | Mean difference      | p-value | Test | Mean difference       | p-value | Test | Mean difference | p-value | Test | Mean difference     | p-value | Test | Mean difference       | p-value | Test | Mean difference          | p-value | Test | Mean difference         | p-value | Test | Mean difference              | p-value | Test | Mean difference       | p-value | Test |
| First period                         | 27.95                | 0.00    | N    | 26.92                 | 0.00    | P    | 10.17           | 0.00    | P    | 15.72               | 0.00    | P    | 24.60                 | 0.00    | P    | 12.84                    | 0.00    | P    | 10.78                   | 0.00    | P    | 16.49                        | 0.000   | P    | 11.00                 | 0.00    | P    |
| Second period                        | 3.40                 | 0.00    | P    | 4.25                  | 0.00    | P    | 2.67            | 0.00    | P    | 2.83                | 0.00    | P    | 0.81                  | 0.00    | NP   | 3.56                     | 0.00    | NP   | 2.53                    | 0.00    | P    | 4.34                         | 0.003   | P    | 3.51                  | 0.00    | P    |
| Third period                         | 18.19                | 0.00    | P    | 27.42                 | 0.00    | P    | 13.07           | 0.00    | P    | 13.35               | 0.00    | P    | 28.53                 | 0.00    | P    | 16.46                    | 0.00    | P    | 15.19                   | 0.00    | P    | 11.47                        | 0.000   | P    | 20.62                 | 0.00    | P    |
| Fourth period                        | 12.64                | 0.00    | P    | 17.46                 | 0.00    | P    | 2.28            | 0.00    | P    | 2.27                | 0.00    | P    | 14.51                 | 0.00    | P    | 4.80                     | 0.00    | P    | 3.66                    | 0.00    | P    | 3.75                         | 0.009   | P    | 5.22                  | 0.00    | P    |
| Fifth period                         | 11.65                | 0.00    | P    | 6.53                  | 0.00    | P    | 3.41            | 0.00    | P    | 3.89                | 0.00    | P    | 8.51                  | 0.00    | P    | 6.54                     | 0.00    | P    | 3.46                    | 0.00    | P    | 1.92                         | 0.148   | P    | 5.31                  | 0.00    | P    |
| Sixth period                         | -                    | -       | -    | 5.57                  | 0.00    | P    | 0.75            | 0.00    | P    | -3.56               | 0.00    | P    | -4.57                 | 0.00    | P    | -1.00                    | 0.00    | P    | -2.77                   | 0.00    | P    | -3.62                        | 0.192   | P    | -3.61                 | 0.00    | P    |
| SUT Air quality station              | SUT 10-Leganés       |         |      | SUT 11-Getafe         |         |      | SUT 12-Coslada  |         |      | SUT 13-Alcobendas   |         |      | SUT 14-Colmenar Viejo |         |      | SUT 15-Alcalá de Henares |         |      | SUT 16-Collado Villalba |         |      | SUT 17-Villarejo de Salvanés |         |      |                       |         |      |
| COVID-19 periods                     | Mean difference      | p-value | Test | Mean difference       | p-value | Test | Mean difference | p-value | Test | Mean difference     | p-value | Test | Mean difference       | p-value | Test | Mean difference          | p-value | Test | Mean difference         | p-value | Test | Mean difference              | p-value | Test |                       |         |      |
| First period                         | 11.60                | 0.00    | P    | 9.56                  | 0.00    | P    | 17.30           | 0.00    | P    | 7.74                | 0.00    | P    | 12.85                 | 0.00    | P    | 8.21                     | 0.00    | P    | 8.73                    | 0.00    | P    | 3.19                         | 0.000   | NP   |                       |         |      |
| Second period                        | -0.51                | 0.00    | P    | 0.90                  | 0.00    | P    | 6.66            | 0.00    | P    | 0.90                | 0.00    | P    | 0.43                  | 0.00    | NP   | -0.41                    | 0.00    | P    | -0.37                   | 0.00    | NP   | 0.31                         | 0.672   | P    |                       |         |      |
| Third period                         | 16.57                | 0.00    | P    | 18.44                 | 0.00    | P    | 19.62           | 0.00    | P    | 13.12               | 0.00    | P    | 14.49                 | 0.00    | P    | 15.80                    | 0.00    | P    | 12.98                   | 0.00    | P    | 6.25                         | 0.000   | P    |                       |         |      |
| Fourth period                        | 3.41                 | 0.00    | P    | 4.64                  | 0.00    | P    | 12.78           | 0.00    | P    | 3.93                | 0.00    | P    | 7.34                  | 0.00    | P    | 3.47                     | 0.00    | P    | 3.71                    | 0.00    | P    | 1.44                         | 0.015   | NP   |                       |         |      |
| Fifth period                         | 0.77                 | 0.00    | P    | 3.66                  | 0.00    | P    | 7.31            | 0.00    | P    | 3.99                | 0.00    | P    | 3.21                  | 0.00    | NP   | 1.44                     | 0.00    | P    | 1.62                    | 0.00    | P    | 1.75                         | 0.007   | P    |                       |         |      |
| Sixth period                         | -8.45                | 0.00    | P    | -8.00                 | 0.00    | P    | -2.85           | 0.00    | P    | -1.26               | 0.00    | P    | -3.83                 | 0.00    | NP   | -3.90                    | 0.00    | NP   | 1.63                    | 0.00    | NP   | -1.28                        | 0.433   | P    |                       |         |      |
| NO <sub>x</sub> (µg/m <sup>3</sup> ) |                      |         |      |                       |         |      |                 |         |      |                     |         |      |                       |         |      |                          |         |      |                         |         |      |                              |         |      |                       |         |      |
| UT Air quality station               | UT 1-Plaza de España |         |      | UT 2-Escuelas Aguirre |         |      | UT 3-Castellana |         |      | UT 4-Cuatro Caminos |         |      | UT 5-Plaza Elíptica   |         |      | UT 6-Ramón y Cajal       |         |      | UT 7-Moratalaz          |         |      | UT 8-Plaza de Castilla       |         |      | UT 9-Barrio del Pilar |         |      |
| COVID-19 periods                     | Mean difference      | p-value | Test | Mean difference       | p-value | Test | Mean difference | p-value | Test | Mean difference     | p-value | Test | Mean difference       | p-value | Test | Mean difference          | p-value | Test | Mean difference         | p-value | Test | Mean difference              | p-value | Test | Mean difference       | p-value | Test |
| First period                         | 33.51                | 0.00    | P    | 39.83                 | 0.00    | P    | 14.10           | 0.00    | P    | 23.12               | 0.00    | P    | 52.66                 | 0.00    | NP   | 19.77                    | 0.00    | NP   | 16.91                   | 0.00    | NP   | 25.08                        | 0.000   | NP   | 20.81                 | 0.00    | P    |
| Second period                        | -3.75                | 0.00    | P    | 7.25                  | 0.00    | P    | 5.62            | 0.00    | P    | -1.27               | 0.00    | P    | 1.10                  | 0.00    | P    | 5.33                     | 0.00    | NP   | 3.65                    | 0.00    | NP   | 9.55                         | 0.000   | NP   | 3.07                  | 0.00    | P    |
| Third period                         | 10.25                | 0.00    | P    | 63.92                 | 0.00    | P    | 28.30           | 0.00    | P    | 46.19               | 0.00    | P    | 100.66                | 0.00    | P    | 40.04                    | 0.00    | NP   | 44.75                   | 0.00    | P    | 28.46                        | 0.000   | NP   | 63.81                 | 0.00    | P    |
| Fourth period                        | 21.95                | 0.00    | P    | 25.79                 | 0.00    | P    | 4.86            | 0.00    | P    | 5.04                | 0.00    | P    | 41.49                 | 0.00    | NP   | 7.58                     | 0.00    | P    | 7.43                    | 0.00    | NP   | 9.48                         | 0.000   | P    | 12.73                 | 0.00    | P    |

|                         |                 |         |      |                 |         |      |                 |         |        |                    |         |      |                        |         |      |                           |         |      |                         |         |        |                              |         |      |                 |         |      |                 |         |       |      |       |       |   |   |   |
|-------------------------|-----------------|---------|------|-----------------|---------|------|-----------------|---------|--------|--------------------|---------|------|------------------------|---------|------|---------------------------|---------|------|-------------------------|---------|--------|------------------------------|---------|------|-----------------|---------|------|-----------------|---------|-------|------|-------|-------|---|---|---|
| <i>Fifth period</i>     | 18.66           | 0.00    | N    | P               | 13.05   | 0.00 | N               | P       | 8.69   | 0.01               | N       | P    | 10.05                  | 0.02    | N    | P                         | 23.02   | 0.00 | 0                       | NP      | 12.61  | 0.00                         | 0       | NP   | 8.13            | 0.00    | 0    | NP              | 8.42    | 0.002 | NP   | 11.05 | 0.00  | 3 | N | P |
|                         |                 |         |      |                 |         | 0.0  |                 |         |        | 0.5                |         |      |                        | 0.9     |      |                           |         | 0.83 |                         |         | 0.93   |                              |         | 0.85 |                 |         |      |                 |         |       | 0.50 |       |       |   |   |   |
| <i>Sixth period</i>     | -               | -       | -    | -               | 17.70   | 36   | P               | P       | 6.26   | 58                 | P       | P    | -0.74                  | 50      | P    | P                         | 2.72    | 4    | P                       | P       | 0.77   | 7                            | P       | P    | -1.62           | 0       | P    | P               | 6.15    | 0.438 | P    | P     | -8.21 | 9 | P | P |
| SUT Air quality station | SUT 10 -Leganés |         |      | SUT 11 -Getafe  |         |      | SUT 12 -Coslada |         |        | SUT 13 -Alcobendas |         |      | SUT 14 -Colmenar Viejo |         |      | SUT 15 -Alcalá de Henares |         |      | SUT 16-Collado Villalba |         |        | SUT 17-Villarejo de Salvanés |         |      |                 |         |      |                 |         |       |      |       |       |   |   |   |
| COVID-19 periods        | Mean difference | p-value | Test | Mean difference | p-value | Test | Mean difference | p-value | Test   | Mean difference    | p-value | Test | Mean difference        | p-value | Test | Mean difference           | p-value | Test | Mean difference         | p-value | Test   | Mean difference              | p-value | Test | Mean difference | p-value | Test | Mean difference | p-value | Test  |      |       |       |   |   |   |
| <i>First period</i>     | 17.27           | 0.00    | N    | P               | 14.36   | 0.00 | N               | P       | 20.77  | 0.00               | N       | P    | 9.87                   | 0.00    | N    | P                         | 16.13   | 0.00 | 0                       | NP      | 12.98  | 0.00                         | 0       | NP   | 14.25           | 0.00    | 0    | NP              | 3.82    | 0.000 | NP   |       |       |   |   |   |
| <i>Second period</i>    | -6.71           | 0.18    | N    | P               | -4.20   | 0.38 | N               | P       | 1.31   | 0.56               | N       | P    | -0.82                  | 0.87    | N    | P                         | -0.89   | 0.44 | 4                       | NP      | -3.85  | 0.19                         | 8       | NP   | -2.28           | 0.56    | 5    | NP              | -0.38   | 0.749 | NP   |       |       |   |   |   |
| <i>Third period</i>     | 58.98           | 0.00    | N    | P               | 68.05   | 0.00 | N               | P       | 50.96  | 0.00               | N       | P    | 44.03                  | 0.00    | N    | P                         | 27.61   | 0.00 | 0                       | P       | 57.36  | 0.00                         | 0       | P    | 44.83           | 0.00    | 0    | NP              | 16.14   | 0.000 | P    |       |       |   |   |   |
| <i>Fourth period</i>    | 4.97            | 0.88    | N    | P               | 7.60    | 0.08 | N               | P       | 12.38  | 0.00               | N       | P    | 4.19                   | 0.11    | N    | P                         | 8.49    | 0.00 | 0                       | P       | 6.28   | 0.00                         | 1       | NP   | 6.30            | 0.00    | 1    | P               | 2.10    | 0.006 | NP   |       |       |   |   |   |
| <i>Fifth period</i>     | 4.16            | 0.63    | N    | P               | 7.41    | 0.18 | N               | P       | 8.77   | 0.01               | N       | P    | 7.51                   | 0.00    | N    | P                         | 3.49    | 0.01 | 2                       | NP      | 2.90   | 0.11                         | 9       | NP   | 4.73            | 0.08    | 7    | NP              | 2.30    | 0.009 | NP   |       |       |   |   |   |
| <i>Sixth period</i>     | -24.54          | 0.94    | N    | P               | -20.22  | 0.14 | N               | P       | -26.28 | 0.03               | N       | P    | -1.78                  | 0.85    | N    | P                         | -4.63   | 0.35 | 8                       | P       | -19.20 | 0.06                         | 7       | P    | 3.40            | 0.73    | 6    | P               | 0.53    | 0.568 | NP   |       |       |   |   |   |

Supplementary Table S2. Results for particulate matter: mean comparison (Student's t-test for parametric samples; P and Wilcoxon rank-sum test for non-parametric samples NP) of daily average concentrations ( $\mu\text{g}/\text{m}^3$ ) from traffic air quality stations (UT and SUT) and mean difference in the six COVID-19 periods identified in the pandemic scenario.

| PM <sub>2.5</sub> (µg/m³) |                       |         |      |                 |         |      |                     |         |      |                          |         |      |                          |         |      |                              |         |      |
|---------------------------|-----------------------|---------|------|-----------------|---------|------|---------------------|---------|------|--------------------------|---------|------|--------------------------|---------|------|------------------------------|---------|------|
| UT Air quality stations   | UT 2-Escuelas Aguirre |         |      | UT 3-Castellana |         |      | UT 4-Cuatro Caminos |         |      | UT 5-Plaza Elíptica      |         |      | UT 8-Plaza de Castilla   |         |      |                              |         |      |
| COVID-19 periods          | Mean difference       | p-value | Test | Mean difference | p-value | Test | Mean difference     | p-value | Test | Mean difference          | p-value | Test | Mean difference          | p-value | Test |                              |         |      |
| First period              | 0.55                  | 0.519   | P    | -0.54           | 0.122   | P    | 0.27                | 0.476   | P    | 1.25                     | 0.005   | P    | 0.88                     | 0.011   | P    |                              |         |      |
| Second period             | -0.07                 | 0.906   | P    | -0.04           | 0.942   | P    | -1.23               | 0.024   | P    | 1.21                     | 0.031   | P    | -0.68                    | 0.144   | P    |                              |         |      |
| Third period              | 5.15                  | 0.000   | NP   | 1.88            | 0.041   | NP   | 3.07                | 0.005   | P    | 5.26                     | 0.000   | P    | 1.53                     | 0.080   | P    |                              |         |      |
| Fourth period             | 0.99                  | 0.526   | NP   | -1.84           | 0.000   | NP   | -1.54               | 0.002   | NP   | 0.04                     | 0.922   | P    | -2.18                    | 0.000   | NP   |                              |         |      |
| Fifth period              | -0.16                 | 0.357   | NP   | -1.77           | 0.412   | NP   | -0.25               | 0.635   | P    | 0.96                     | 0.039   | NP   | -3.13                    | 0.009   | NP   |                              |         |      |
| Sixth period              | 0.62                  | 0.971   | NP   | 1.90            | 0.071   | P    | 3.31                | 0.004   | NP   | 0.92                     | 0.382   | P    | 0.67                     | 0.943   | NP   |                              |         |      |
| SUT Air quality stations  | SUT 10-Leganés        |         |      | SUT 11-Getafe   |         |      | SUT 12-Coslada      |         |      | SUT 15-Alcalá de Henares |         |      | SUT 16 -Collado Villalba |         |      | SUT 17-Villarejo de Salvánés |         |      |
| COVID-19 periods          | Mean difference       | p-value | Test | Mean difference | p-value | Test | Mean difference     | p-value | Test | Mean difference          | p-value | Test | Mean difference          | p-value | Test | Mean difference              | p-value | Test |
| First period              | -0.34                 | 0.441   | P    | 0.55            | 0.206   | P    | 0.75                | 0.116   | P    | 0.43                     | 0.319   | P    | -1.86                    | 0.000   | P    | 0.49                         | 0.323   | P    |
| Second period             | -1.28                 | 0.239   | NP   | -1.85           | 0.035   | NP   | -0.15               | 0.809   | P    | -0.82                    | 0.549   | NP   | -1.69                    | 0.007   | P    | -1.90                        | 0.001   | P    |
| Third period              | 1.18                  | 0.452   | P    | 2.49            | 0.020   | NP   | 2.36                | 0.089   | P    | 4.14                     | 0.000   | P    | 2.24                     | 0.249   | NP   | 1.22                         | 0.407   | NP   |
| Fourth period             | -3.10                 | 0.000   | NP   | -0.53           | 0.742   | NP   | -3.52               | 0.000   | NP   | -0.28                    | 0.833   | NP   | -3.92                    | 0.000   | NP   | -2.55                        | 0.000   | NP   |
| Fifth period              | 1.11                  | 0.014   | NP   | 2.32            | 0.000   | P    | 0.53                | 0.206   | NP   | 3.68                     | 0.000   | NP   | 1.64                     | 0.002   | P    | -0.37                        | 0.550   | NP   |
| Sixth period              | -0.44                 | 0.773   | P    | -1.75           | 0.100   | P    | -1.01               | 0.428   | P    | 1.32                     | 0.612   | NP   | 2.01                     | 0.152   | P    | -1.38                        | 0.090   | P    |
| PM <sub>10</sub> (µg/m³)  |                       |         |      |                 |         |      |                     |         |      |                          |         |      |                          |         |      |                              |         |      |
| UT Air quality stations   | UT 2-Escuelas Aguirre |         |      | UT 3-Castellana |         |      | UT 4-Cuatro Caminos |         |      | UT 5-Plaza Elíptica      |         |      | UT 8-Plaza de Castilla   |         |      | UT 9-Moratalaz               |         |      |
| COVID-19 periods          | Mean difference       | p-value | Test | Mean difference | p-value | Test | Mean difference     | p-value | Test | Mean difference          | p-value | Test | Mean difference          | p-value | Test | Mean difference              | p-value | Test |
| First period              | 4.68                  | 0.000   | P    | 2.35            | 0.003   | P    | 2.83                | 0.001   | NP   | 5.98                     | 0.000   | P    | 4.43                     | 0.000   | P    | 3.82                         | 0.000   | P    |
| Second period             | 0.21                  | 0.870   | P    | 2.33            | 0.037   | NP   | -1.99               | 0.095   | P    | 4.49                     | 0.000   | P    | 2.25                     | 0.034   | NP   | -0.63                        | 0.868   | NP   |
| Third period              | 9.16                  | 0.000   | P    | 2.08            | 0.090   | NP   | 5.43                | 0.001   | P    | 9.88                     | 0.000   | P    | 0.74                     | 0.345   | NP   | -0.44                        | 0.003   | NP   |
| Fourth period             | 0.05                  | 0.782   | NP   | -2.43           | 0.064   | NP   | -2.57               | 0.103   | NP   | 0.98                     | 0.133   | NP   | -4.35                    | 0.000   | NP   | -3.87                        | 0.011   | NP   |
| Fifth period              | 0.78                  | 0.294   | NP   | 0.94            | 0.253   | NP   | 2.53                | 0.034   | P    | 1.39                     | 0.072   | NP   | -1.79                    | 0.726   | NP   | 0.16                         | 0.153   | NP   |
| Sixth period              | 2.43                  | 0.053   | P    | 1.34            | 0.570   | NP   | 2.57                | 0.069   | P    | 0.98                     | 0.464   | P    | -1.70                    | 0.201   | P    | -0.33                        | 0.832   | P    |
| SUT Air quality stations  | SUT 10 -Leganés       |         |      | SUT 11-Getafe   |         |      | SUT 12-Coslada      |         |      | SUT 13-Alcobendas        |         |      | SUT 14-Colmenar Viejo    |         |      | SUT 15-Alcalá de Henares     |         |      |
| COVID-19 periods          | Mean difference       | p-value | Test | Mean difference | p-value | Test | Mean difference     | p-value | Test | Mean difference          | p-value | Test | Mean difference          | p-value | Test | Mean difference              | p-value | Test |
| First period              | -0.07                 | 0.941   | P    | 4.22            | 0.000   | P    | 3.65                | 0.000   | P    | 0.14                     | 0.667   | NP   | -0.37                    | 0.784   | NP   | -0.11                        | 0.740   | NP   |
| Second period             | -1.85                 | 0.156   | P    | 0.04            | 0.978   | P    | -1.41               | 0.227   | P    | -1.06                    | 0.624   | NP   | 0.16                     | 0.420   | NP   | -1.64                        | 0.338   | NP   |
| Third period              | 3.31                  | 0.137   | NP   | 7.76            | 0.001   | P    | 2.94                | 0.038   | NP   | -2.05                    | 0.661   | NP   | 0.02                     | 0.152   | NP   | 6.41                         | 0.000   | P    |
| Fourth period             | -6.15                 | 0.000   | NP   | 0.27            | 0.187   | NP   | -1.72               | 0.659   | NP   | -2.65                    | 0.134   | NP   | -5.36                    | 0.002   | NP   | -2.55                        | 0.137   | NP   |
| Fifth period              | -1.09                 | 0.828   | NP   | 5.49            | 0.000   | NP   | -0.29               | 0.564   | NP   | 2.34                     | 0.009   | NP   | 2.81                     | 0.001   | NP   | 2.82                         | 0.001   | NP   |
| Sixth period              | -3.93                 | 0.128   | P    | 0.12            | 0.953   | P    | -3.47               | 0.071   | P    | 2.97                     | 0.047   | P    | 0.49                     | 0.721   | P    | -0.17                        | 0.918   | P    |

Supplementary Table S3. Results for ozone: mean comparison (Student's t-test for parametric samples; P and Wilcoxon rank-sum test for non-parametric samples NP) of daily average concentrations ( $\mu\text{g}/\text{m}^3$ ) from traffic air quality stations (UT and SUT) for urban traffic and mean difference in the six COVID-19 periods identified in the pandemic scenario.

| $O_3$ ( $\mu\text{g}/\text{m}^3$ ) |                       |         |      |                     |         |      |                       |         |      |
|------------------------------------|-----------------------|---------|------|---------------------|---------|------|-----------------------|---------|------|
| UT Air quality station             | UT 2-Escuelas Aguirre |         |      | UT 5-Plaza Elíptica |         |      | UT 9-Barrio del Pilar |         |      |
| COVID-19 periods                   | Mean difference       | P-value | Test | Mean difference     | P-value | Test | Mean difference       | P-value | Test |
| First period                       | -2.69                 | 0.114   | P    | 0.24                | 0.884   | P    | 5.57                  | 0.001   | P    |
| Second period                      | -4.58                 | 0.169   | NP   | 8.97                | 0.000   | P    | 5.66                  | 0.000   | P    |
| Third period                       | -6.54                 | 0.006   | P    | -9.45               | 0.106   | P    | -2.76                 | 0.294   | P    |
| Fourth period                      | 2.17                  | 0.131   | P    | -                   | -       | -    | 12.68                 | 0.000   | P    |
| Fifth period                       | -9.41                 | 0.000   | NP   | -                   | -       | -    | -1.40                 | 0.350   | P    |
| Sixth period                       | -2.61                 | 0.314   | P    | -                   | -       | -    | 4.02                  | 0.268   | P    |

| SUT Air quality station | SUT 10 -Leganés |         |      | SUT 11 -Getafe  |         |      | SUT 12 -Coslada |         |      | SUT 13 -Alcobendas |         |      | SUT 14 -Colmenar Viejo |         |      | SUT 15 -Alcalá de Henares |         |      | SUT 16 -Collado Villalba |         |      | SUT 17 -Villarejo de Salvanés |         |      |
|-------------------------|-----------------|---------|------|-----------------|---------|------|-----------------|---------|------|--------------------|---------|------|------------------------|---------|------|---------------------------|---------|------|--------------------------|---------|------|-------------------------------|---------|------|
| COVID-19 periods        | Mean difference | P-value | Test | Mean difference | P-value | Test | Mean difference | P-value | Test | Mean difference    | p-value | Test | Mean difference        | p-value | Test | Mean difference           | P-value | Test | Mean difference          | P-value | Test | Mean difference               | P-value | Test |
| First period            | 6.42            | 0.000   | P    | 14.67           | 0.000   | P    | 4.77            | 0.007   | P    | 9.07               | 0.000   | P    | 13.80                  | 0.000   | P    | 9.55                      | 0.000   | P    | 9.70                     | 0.000   | P    | 12.77                         | 0.000   | P    |
| Second period           | 4.89            | 0.002   | P    | 7.27            | 0.000   | P    | 9.11            | 0.000   | P    | 7.59               | 0.000   | P    | 4.96                   | 0.001   | P    | 6.86                      | 0.000   | P    | 13.74                    | 0.000   | P    | 3.57                          | 0.008   | P    |
| Third period            | -7.49           | 0.006   | P    | -7.92           | 0.004   | P    | -7.31           | 0.003   | P    | -6.62              | 0.023   | P    | -7.66                  | 0.002   | P    | -4.70                     | 0.054   | P    | -2.19                    | 0.243   | NP   | -6.20                         | 0.011   | P    |
| Fourth period           | 7.14            | 0.000   | P    | 8.89            | 0.000   | P    | 3.18            | 0.072   | P    | 10.00              | 0.000   | P    | 7.15                   | 0.000   | P    | 8.99                      | 0.000   | P    | 7.64                     | 0.000   | P    | 6.66                          | 0.000   | P    |
| Fifth period            | -2.35           | 0.122   | P    | 7.77            | 0.000   | P    | 3.40            | 0.032   | P    | 6.21               | 0.000   | P    | 4.83                   | 0.003   | P    | 3.47                      | 0.019   | P    | 10.39                    | 0.000   | P    | -4.44                         | 0.004   | P    |
| Sixth period            | 3.32            | 0.378   | P    | 4.91            | 0.150   | P    | -5.08           | 0.150   | P    | -0.62              | 0.860   | P    | -5.40                  | 0.053   | P    | 5.84                      | 0.106   | P    | 6.58                     | 0.087   | P    | -10.23                        | 0.001   | P    |

Supplementary Table S4. Results for NO<sub>2</sub> and NO<sub>x</sub>: mean comparison (Student's t-test for parametric samples; P and Wilcoxon rank-sum test for non-parametric samples (NP) of daily average concentrations (µg/m<sup>3</sup>) from traffic air quality stations (UT and SUT) and mean difference in the two post pandemic periods identified.

| NO <sub>2</sub> (µg/m <sup>3</sup> ) |                      |         |      |                       |         |      |                 |         |      |                     |         |      |                        |         |      |                           |         |      |                          |         |      |                               |         |      |                       |         |      |
|--------------------------------------|----------------------|---------|------|-----------------------|---------|------|-----------------|---------|------|---------------------|---------|------|------------------------|---------|------|---------------------------|---------|------|--------------------------|---------|------|-------------------------------|---------|------|-----------------------|---------|------|
| UT Air quality station               | UT 1-Plaza de España |         |      | UT 2-Escuelas Aguirre |         |      | UT 3-Castellana |         |      | UT 4-Cuatro Caminos |         |      | UT 5-Plaza Elíptica    |         |      | UT 6-Ramón y Cajal        |         |      | UT 7-Moratalaz           |         |      | UT 8-Plaza de Castilla        |         |      | UT 9-Barrio del Pilar |         |      |
| COVID-19 periods                     | Mean difference      | p-value | Test | Mean difference       | p-value | Test | Mean difference | p-value | Test | Mean difference     | p-value | Test | Mean difference        | p-value | Test | Mean difference           | p-value | Test | Mean difference          | p-value | Test | Mean difference               | p-value | Test | Mean difference       | p-value | Test |
| Seventh period                       | 12.15                | 0.00    | NP   | 19.17                 | 0.00    | P    | 3.44            | 0.00    | P    | 5.22                | 0.00    | P    | 15.02                  | 0.00    | P    | 7.25                      | 0.00    | P    | 4.75                     | 0.000   | P    | 0.51                          | 0.704   | P    | 5.78                  | 0.00    | P    |
| Eight period                         | -5.88                | 0.34    | NP   | 8.99                  | 0.00    | P    | 6.43            | 0.00    | P    | 5.57                | 0.00    | P    | 10.90                  | 0.00    | P    | 6.92                      | 0.00    | P    | 8.31                     | 0.000   | P    | 4.14                          | 0.001   | P    | 5.38                  | 0.00    | P    |
| SUT Air quality station              | SUT 10 -Leganés      |         |      | SUT 11 -Getafe        |         |      | SUT 12 -Coslada |         |      | SUT 13 -Alcobendas  |         |      | SUT 14 -Colmenar Viejo |         |      | SUT 15 -Alcalá de Henares |         |      | SUT 16 -Collado Villalba |         |      | SUT 17 -Villarejo de Salvanés |         |      |                       |         |      |
| COVID-19 periods                     | Mean difference      | p-value | Test | Mean difference       | p-value | Test | Mean difference | p-value | Test | Mean difference     | p-value | Test | Mean difference        | p-value | Test | Mean difference           | p-value | Test | Mean difference          | p-value | Test | Mean difference               | p-value | Test |                       |         |      |
| Seventh period                       | 4.01                 | 0.00    | P    | 4.49                  | 0.00    | NP   | 14.69           | 0.00    | P    | 5.41                | 0.00    | P    | 7.19                   | 0.00    | P    | 3.18                      | 0.00    | P    | 7.19                     | 0.000   | P    | 2.10                          | 0.001   | NP   |                       |         |      |
| Eight period                         | 3.03                 | 0.05    | P    | 2.35                  | 0.12    | P    | 7.04            | 0.00    | P    | 3.87                | 0.00    | P    | 0.63                   | 0.70    | NP   | 2.19                      | 0.03    | P    | 0.63                     | 0.707   | NP   | 3.03                          | 0.000   | P    |                       |         |      |
| NO <sub>x</sub> (µg/m <sup>3</sup> ) |                      |         |      |                       |         |      |                 |         |      |                     |         |      |                        |         |      |                           |         |      |                          |         |      |                               |         |      |                       |         |      |
| UT Air quality station               | UT 1-Plaza de España |         |      | UT 2-Escuelas Aguirre |         |      | UT 3-Castellana |         |      | UT 4-Cuatro Caminos |         |      | UT 5-Plaza Elíptica    |         |      | UT 6-Ramón y Cajal        |         |      | UT 7-Moratalaz           |         |      | UT 8-Plaza de Castilla        |         |      | UT 9-Barrio del Pilar |         |      |
| COVID-19 periods                     | Mean difference      | p-value | Test | Mean difference       | p-value | Test | Mean difference | p-value | Test | Mean difference     | p-value | Test | Mean difference        | p-value | Test | Mean difference           | p-value | Test | Mean difference          | p-value | Test | Mean difference               | p-value | Test | Mean difference       | p-value | Test |
| Seventh period                       | 38.92                | 0.00    | NP   | 26.42                 | 0.00    | P    | 7.44            | 0.00    | NP   | 5.22                | 0.00    | P    | 15.02                  | 0.00    | P    | 7.25                      | 0.000   | P    | 4.75                     | 0.000   | P    | 0.51                          | 0.704   | P    | 5.78                  | 0.00    | P    |
| Eight period                         | 30.12                | 0.00    | NP   | 17.95                 | 0.00    | NP   | 11.28           | 0.00    | NP   | 5.57                | 0.00    | P    | 10.90                  | 0.00    | P    | 6.92                      | 0.000   | P    | 8.31                     | 0.000   | P    | 4.14                          | 0.001   | P    | 5.38                  | 0.00    | P    |
| SUT Air quality station              | SUT 10 -Leganés      |         |      | SUT 11 -Getafe        |         |      | SUT 12 -Coslada |         |      | SUT 13 -Alcobendas  |         |      | SUT 14 -Colmenar Viejo |         |      | SUT 15 -Alcalá de Henares |         |      | SUT 16 -Collado Villalba |         |      | SUT 17 -Villarejo de Salvanés |         |      |                       |         |      |
| COVID-19 periods                     | Mean difference      | p-value | Test | Mean difference       | p-value | Test | Mean difference | p-value | Test | Mean difference     | p-value | Test | Mean difference        | p-value | Test | Mean difference           | p-value | Test | Mean difference          | p-value | Test | Mean difference               | p-value | Test |                       |         |      |
| Seventh period                       | 7.45                 | 0.00    | NP   | 9.39                  | 0.00    | NP   | 17.55           | 0.00    | P    | 7.11                | 0.00    | NP   | 11.44                  | 0.00    | NP   | 6.60                      | 0.001   | NP   | 11.80                    | 0.000   | NP   | 2.74                          | 0.000   | NP   |                       |         |      |
| Eight period                         | 4.23                 | 0.14    | NP   | 2.80                  | 0.33    | NP   | 7.87            | 0.56    | NP   | 6.19                | 0.00    | NP   | 1.82                   | 0.06    | NP   | 2.54                      | 0.600   | NP   | 0.51                     | 0.953   | NP   | 3.76                          | 0.000   | NP   |                       |         |      |

Supplementary Table S5. Results for pollutant matter: mean comparison (Student's t-test for parametric samples; P and Wilcoxon rank-sum test for non-parametric samples NP) of daily average concentrations ( $\mu\text{g}/\text{m}^3$ ) from traffic air quality stations (UT and SUT) and mean difference in the two post pandemic periods identified.

| <i>PM<sub>2.5</sub></i> ( $\mu\text{g}/\text{m}^3$ ) |                       |         |      |                 |         |      |                     |         |      |                          |         |      |                          |         |      |                              |         |      |
|------------------------------------------------------|-----------------------|---------|------|-----------------|---------|------|---------------------|---------|------|--------------------------|---------|------|--------------------------|---------|------|------------------------------|---------|------|
| UT Air quality station                               | UT 2-Escuelas Aguirre |         |      | UT 3-Castellana |         |      | UT 4-Cuatro Caminos |         |      | UT 5-Plaza Elíptica      |         |      | UT 8-Plaza de Castilla   |         |      |                              |         |      |
| COVID-19 periods                                     | Mean difference       | p-value | Test | Mean difference | p-value | Test | Mean difference     | p-value | Test | Mean difference          | p-value | Test | Mean difference          | p-value | Test |                              |         |      |
| <i>Seventh period</i>                                | -0.90                 | 0.819   | NP   | -1.44           | 0.038   | NP   | -2.89               | 0.005   | NP   | -1.87                    | 0.014   | NP   | -1.64                    | 0.306   | NP   |                              |         |      |
| <i>Eight period</i>                                  | -10.59                | 0.000   | NP   | -0.50           | 0.550   | NP   | -5.80               | 0.000   | NP   | 6.20                     | 0.397   | NP   | -2.79                    | 0.202   | NP   |                              |         |      |
| SUT Air quality stations                             | SUT 10-Leganés        |         |      | SUT 11-Getafe   |         |      | SUT 12-Coslada      |         |      | SUT 15-Alcalá de Henares |         |      | SUT 16 -Collado Villalba |         |      | SUT 17-Villarejo de Salvanés |         |      |
| COVID-19 periods                                     | Mean difference       | p-value | Test | Mean difference | p-value | Test | Mean difference     | p-value | Test | Mean difference          | p-value | Test | Mean difference          | p-value | Test | Mean difference              | p-value | Test |
| <i>Seventh period</i>                                | -0.08                 | 0.244   | NP   | -1.01           | 0.669   | NP   | -0.89               | 0.217   | NP   | 0.01                     | 0.193   | NP   | -3.05                    | 0.000   | NP   | -1.79                        | 0.535   | NP   |
| <i>Eight period</i>                                  | 1.73                  | 0.000   | NP   | 1.06            | 0.003   | NP   | 0.25                | 0.228   | NP   | 3.00                     | 0.000   | NP   | 1.44                     | 0.066   | P    | -1.15                        | 0.086   | NP   |
| <i>PM<sub>10</sub></i> ( $\mu\text{g}/\text{m}^3$ )  |                       |         |      |                 |         |      |                     |         |      |                          |         |      |                          |         |      |                              |         |      |
| UT Air quality stations                              | UT 2-Escuelas Aguirre |         |      | UT 3-Castellana |         |      | UT 4-Cuatro Caminos |         |      | UT 5-Plaza Elíptica      |         |      | UT 8-Plaza de Castilla   |         |      | UT 9-Moratalaz               |         |      |
| COVID-19 periods                                     | Mean difference       | p-value | Test | Mean difference | p-value | Test | Mean difference     | p-value | Test | Mean difference          | p-value | Test | Mean difference          | p-value | Test | Mean difference              | p-value | Test |
| <i>Seventh period</i>                                | -3.17                 | 0.849   | NP   | -4.92           | 0.398   | NP   | -9.56               | 0.001   | NP   | -6.91                    | 0.002   | NP   | -8.28                    | 0.213   | NP   | -9.55                        | 0.016   | NP   |
| <i>Eight period</i>                                  | -11.83                | 0.000   | NP   | 0.27            | 0.792   | NP   | -16.48              | 0.000   | NP   | -7.60                    | 0.000   | NP   | -2.26                    | 0.379   | NP   | -0.52                        | 0.931   | NP   |
| SUT Air quality stations                             | SUT 10 -Leganés       |         |      | SUT 11-Getafe   |         |      | SUT 12-Coslada      |         |      | SUT 13-Alcobendas        |         |      | SUT 14-Colmenar Viejo    |         |      | SUT 15-Alcalá de Henares     |         |      |
| COVID-19 periods                                     | Mean difference       | p-value | Test | Mean difference | p-value | Test | Mean difference     | p-value | Test | Mean difference          | p-value | Test | Mean difference          | p-value | Test | Mean difference              | p-value | Test |
| <i>Seventh period</i>                                | -8.74                 | 0.023   | NP   | -6.44           | 0.496   | NP   | -9.32               | 0.013   | NP   | -7.95                    | 0.065   | NP   | -14.83                   | 0.000   | NP   | -9.21                        | 0.001   | NP   |
| <i>Eight period</i>                                  | -0.28                 | 0.536   | NP   | 1.76            | 0.015   | NP   | -2.32               | 0.106   | NP   | 0.44                     | 0.115   | NP   | -0.86                    | 0.818   | NP   | 0.79                         | 0.071   | NP   |

Supplementary Table S6. Results for ozone: mean comparison (Student's t-test for parametric samples; P and Wilcoxon rank-sum test for non-parametric samples NP) of daily average concentrations ( $\mu\text{g}/\text{m}^3$ ) from traffic air quality stations (UT and SUT) for urban traffic and mean difference in the two post pandemic periods identified.

| $O_3$ ( $\mu\text{g}/\text{m}^3$ ) |                 |                       |      |                 |                       |      |                 |                 |      |                 |                    |      |                 |                        |      |                 |                           |      |                 |                          |      |                 |                               |      |  |
|------------------------------------|-----------------|-----------------------|------|-----------------|-----------------------|------|-----------------|-----------------|------|-----------------|--------------------|------|-----------------|------------------------|------|-----------------|---------------------------|------|-----------------|--------------------------|------|-----------------|-------------------------------|------|--|
| UT Air quality station             |                 | UT 2-Escuelas Aguirre |      |                 | UT 9-Barrio del Pilar |      |                 |                 |      |                 |                    |      |                 |                        |      |                 |                           |      |                 |                          |      |                 |                               |      |  |
| COVID-19 periods                   | Mean difference | p-value               | Test | Mean difference | p-value               | Test |                 |                 |      |                 |                    |      |                 |                        |      |                 |                           |      |                 |                          |      |                 |                               |      |  |
| Seventh period                     | 0.07            | 0.970                 | P    | 2.80            | 0.092                 | P    |                 |                 |      |                 |                    |      |                 |                        |      |                 |                           |      |                 |                          |      |                 |                               |      |  |
| Eight period                       | -10.88          | 0.000                 | NP   | 0.76            | 0.646                 | P    |                 |                 |      |                 |                    |      |                 |                        |      |                 |                           |      |                 |                          |      |                 |                               |      |  |
| SUT Air quality station            |                 | SUT 10 -Leganés       |      |                 | SUT 11 -Getafe        |      |                 | SUT 12 -Coslada |      |                 | SUT 13 -Alcobendas |      |                 | SUT 14 -Colmenar Viejo |      |                 | SUT 15 -Alcalá de Henares |      |                 | SUT 16 -Collado Villalba |      |                 | SUT 17 -Villarejo de Salvanés |      |  |
| COVID-19 periods                   | Mean difference | p-value               | Test | Mean difference | p-value               | Test | Mean difference | p-value         | Test | Mean difference | p-value            | Test | Mean difference | p-value                | Test | Mean difference | p-value                   | Test | Mean difference | p-value                  | Test | Mean difference | p-value                       | Test |  |
| Seventh period                     | 5.50            | 0.001                 | P    | 12.13           | 0.000                 | P    | -1.45           | 0.422           | P    | 8.65            | 0.000              | P    | 12.84           | 0.000                  | P    | 7.38            | 0.000                     | P    | 4.32            | 0.015                    | P    | -0.11           | 0.930                         | P    |  |
| Eight period                       | -4.01           | 0.007                 | P    | 3.99            | 0.001                 | NP   | -1.92           | 0.177           | P    | 4.48            | 0.003              | P    | -6.11           | 0.000                  | P    | -3.01           | 0.030                     | P    | 5.64            | 0.001                    | P    | -9.46           | 0.000                         | P    |  |
